# Supplementary material for: Island ecosystem responses to the Kuwae eruption and precipitation change over the last 1600 years, Efate, Vanuatu
Source: Frontiers journal article supplement (doi:10.3389/fevo.2023.1087577), 2023-02-23
Supplement: Data_Sheet_2.xlsx [file Data_Sheet_2.xlsx]

## Sheet: AP_NAP
depth	AP/NAP
1	0.48913
4	0.171429
22	0.637681
27	0.348881
43	1.09626
59	1.13253
75	1.60714
90	0.885845
106	1.25664
154	0.639344
156	1.5
157	1.408
158	1.34591
159	0.878378
167	1.22222
168	0.947368
169	1.15882
177	1.19388
192	0.940678
207	1.24194
227	1.27907
237	1.29508
251	0.838565
266	1.96
281	1.28409
296	0.802083
311	0.94697
321	0.950704
322	0.733032
332	0.698492
335	0.972028
341	0.485269

## Sheet: chironomids_%
depth	Procladius	Tanypodinane undiff.	Orthocladinae T1 (similar to Pseudorthocladius)	Orthocladinae T2	Chironomus anthracinus type	Polypedilum nubifer type	near Polypedilum	Chironomini undiff.	Tanytarsus funebris type	Tanytarsus undiff.	unid. Degraded
61	52.9412	0	0	0	1.17647	0	1.17647	1.17647	38.8235	3.52941	1.17647
111	35.0649	3.8961	1.2987	0	2.5974	1.2987	1.2987	0	51.9481	2.5974	0
160	29.7297	8.10811	0	0	0	5.40541	0	1.35135	54.0541	1.35135	0
180	33.0645	0	0	0	0.806452	0.806452	0	0.806452	64.5161	0	0
200	29.434	0	0	0	0	3.01887	0.754717	0	63.7736	3.01887	0
243	4.0404	0	8.08081	2.0202	51.5152	3.0303	2.0202	1.0101	24.2424	4.0404	0
261	34.1463	4.87805	0	0	1.21951	3.65854	2.43902	0	48.7805	0	4.87805
280	39.5833	0	0	0	4.16667	2.08333	0	2.08333	52.0833	0	0
331	80	0	0	0	0	0	0	0	20	0	0
357	31.4286	2.85714	0	0	8.57143	8.57143	0	2.85714	42.8571	2.85714	0

## Sheet: chronology
depth	age	±
0	-66	2
1	-65	2
2	-64	2
3	-63	2
4	-62	3
5	-61	3
6	-59	3
7	-57	4
8	-55	6
9	-52	6
10	-50	8
11	-48	8
12	-47	8
13	-45	9
14	-43	11
15	-41	14
16	-37	13
17	-32	15
18	-28	20
19	-23	25
20	-19	30
21	-11	26
22	-3	31
23	4	41
24	12	52
25	20	66
26	24	66
27	27	66
28	31	69
29	35	73
30	39	78
31	42	77
32	46	77
33	50	80
34	53	82
35	57	87
36	61	85
37	64	85
38	68	85
39	72	87
40	75	90
41	79	87
42	83	86
43	86	85
44	90	86
45	94	88
46	98	85
47	102	83
48	105	82
49	109	83
50	113	88
51	117	86
52	121	88
53	125	92
54	129	98
55	134	106
56	138	103
57	142	101
58	146	103
59	150	107
60	154	111
61	159	109
62	163	107
63	167	108
64	171	111
65	176	114
66	180	111
67	184	107
68	188	108
69	192	110
70	196	111
71	200	109
72	205	107
73	209	106
74	213	107
75	217	108
76	222	106
77	226	105
78	231	104
79	235	106
80	240	110
81	244	109
82	248	111
83	253	115
84	257	117
85	261	124
86	266	122
87	270	125
88	275	129
89	279	130
90	284	135
91	288	132
92	293	131
93	297	132
94	302	135
95	306	138
96	310	136
97	314	134
98	319	134
99	323	135
100	327	139
101	331	135
102	336	134
103	340	134
104	345	137
105	349	139
106	354	136
107	358	134
108	363	133
109	367	134
110	372	137
111	376	135
112	380	134
113	385	137
114	389	139
115	393	143
116	398	141
117	402	142
118	406	144
119	410	147
120	415	150
121	419	148
122	423	148
123	427	149
124	432	151
125	436	154
126	440	151
127	445	151
128	449	151
129	453	152
130	458	154
131	462	154
132	466	152
133	470	151
134	474	151
135	478	153
136	482	150
137	487	149
138	491	148
139	495	148
140	499	150
141	503	147
142	507	145
143	512	145
144	516	145
145	520	147
146	525	145
147	529	142
148	533	142
149	538	143
150	542	145
151	546	142
152	551	139
153	555	139
154	559	140
155	564	140
156	568	135
157	572	132
158	576	130
159	580	130
160	585	131
161	589	126
162	593	123
163	597	120
164	602	119
165	606	120
166	610	117
167	614	113
168	619	109
169	623	108
170	627	107
171	632	104
172	637	102
173	641	100
174	646	102
175	651	110
176	656	109
177	661	111
178	667	114
179	672	121
180	677	130
181	683	126
182	688	122
183	694	123
184	699	127
185	705	132
186	710	128
187	716	128
188	721	130
189	726	137
190	732	144
191	737	139
192	742	138
193	748	140
194	753	144
195	758	150
196	764	146
197	769	144
198	775	144
199	780	147
200	786	150
201	792	146
202	797	147
203	803	152
204	809	157
205	815	161
206	821	160
207	826	160
208	832	161
209	838	165
210	843	170
211	849	168
212	855	168
213	861	173
214	866	178
215	872	183
216	878	180
217	884	182
218	889	183
219	895	186
220	901	189
221	907	189
222	912	188
223	918	189
224	924	187
225	930	193
226	936	192
227	941	193
228	947	195
229	953	198
230	959	202
231	964	199
232	970	200
233	976	202
234	982	204
235	988	211
236	994	206
237	1000	205
238	1006	206
239	1012	209
240	1018	209
241	1024	207
242	1029	206
243	1035	206
244	1041	208
245	1047	211
246	1053	210
247	1059	206
248	1065	204
249	1071	205
250	1077	206
251	1082	200
252	1088	197
253	1094	197
254	1099	200
255	1105	203
256	1111	194
257	1116	188
258	1122	185
259	1128	185
260	1134	187
261	1140	184
262	1146	185
263	1152	186
264	1158	188
265	1164	191
266	1170	191
267	1176	191
268	1182	195
269	1188	199
270	1195	203
271	1200	200
272	1206	199
273	1212	199
274	1218	201
275	1224	205
276	1230	202
277	1235	201
278	1241	203
279	1247	203
280	1252	208
281	1258	205
282	1264	203
283	1269	201
284	1275	203
285	1281	205
286	1287	200
287	1292	198
288	1298	198
289	1304	200
290	1310	203
291	1316	202
292	1322	198
293	1327	195
294	1333	193
295	1339	196
296	1345	191
297	1350	189
298	1356	189
299	1362	192
300	1368	194
301	1374	189
302	1380	184
303	1386	182
304	1392	181
305	1397	183
306	1403	181
307	1409	177
308	1415	175
309	1420	173
310	1426	174
311	1432	168
312	1438	164
313	1444	163
314	1450	159
315	1455	157
316	1461	148
317	1467	141
318	1473	138
319	1479	138
320	1485	140
321	1493	137
322	1500	140
323	1507	144
324	1515	152
325	1522	164
326	1530	163
327	1537	161
328	1545	166
329	1552	173
330	1560	181
331	1567	178
332	1574	178
333	1581	183
334	1588	185
335	1595	192
336	1602	189
337	1609	187
338	1615	189

## Sheet: CN
depth	C/N
0.25	12.3561
0.75	12.9118
2.25	14.2256
4.25	15.0025
6.25	14.9444
8.25	14.0458
11.5	15.5671
12.5	16.338
14.5	15.1102
15.5	15.0079
16.5	13.6603
17.5	13.2882
18.5	12.4907
19.5	13.1676
20.5	11.9484
21.5	12.5971
22.5	12.1659
24.5	11.9866
25.5	11.282
26.5	11.6873
27.5	11.8847
28.5	11.6651
29.5	12.2102
30.5	15.0743
42.5	14.6988
44.5	13.9214
46.5	13.6206
48.5	14.4318
50.5	14.1814
52.5	13.6633
54.5	12.9729
56.5	14.1767
58.5	13.391
60.5	13.9761
62.5	14.2579
64.5	14.0518
66.5	14.166
68.5	13.2944
70.5	13.3929
72.5	14.0705
74.5	14.5196
76.5	13.7318
78.5	14.2382
80.5	13.973
82.5	14.5345
84.5	13.9423
86.5	14.4281
88.5	13.5853
90.5	14.8064
92.5	12.7698
94.5	12.4037
96.5	13.9244
98.5	15.4371
100.5	16.4461
102.5	18.6298
104.5	17.3395
106.5	15.5935
108.5	14.7034
110.5	19.8607
112.5	15.0574
130.5	15.5918
133.5	18.0721
135.5	16.7775
137.5	22.106
139.5	21.4772
141.5	19.992
143.5	17.737
144.5	13.8898
145.5	17.4537
146.5	13.8266
147.5	22.4926
148.5	14.4386
149.5	10.699
150.5	14.5358
151.5	9.98349
152.5	14.4384
153.5	9.98068
154.5	14.5452
156.5	14.7141
158.5	14.168
160.5	13.8491
162.5	14.3669
164.5	14.518
166.5	20.5699
168.5	15.528
170.5	15.0137
172.5	15.2167
174.5	13.5244
176.5	14.5294
178.5	12.2261
180.5	12.6838
182.5	9.39798
184.5	7.80408
186.5	10.2018
188.5	11.7694
190.5	12.2096
192.5	12.9553
194.5	13.9048
196.5	14.2484
198.5	16.8195
200.5	14.8845
202.5	13.9989
202.5	14.5709
204.5	14.572
204.5	11.6964
206.5	14.7468
208.5	15.071
210.5	14.1965
212.5	13.9047
214.5	13.872
216.5	13.39
218.5	14.0096
220.5	14.8298
222.5	14.2838
242.5	15.2628
244.5	14.9352
246.5	15.6028
248.5	15.7097
250.5	15.3426
252.5	14.7751
254.5	14.4296
256.5	15.3294
258.5	14.1888
260.5	14.4322
262.5	15.0435
264.5	13.8353
266.5	15.1364
268.5	14.7127
270.5	15.534
272.5	14.3423
274.5	14.1035
276.5	15.2035
278.5	15.0336
280.5	14.582
282.5	14.8811
284.5	22.0125
286.5	15.7179
288.5	18.3949
290.5	17.753
292.5	17.3588
294.5	16.7895
296.5	17.7
298.5	22.3256
300.5	17.3753
302.5	16.6351
304.5	17.4259
306.5	19.1446
308.5	17.1824
310.5	15.5996
312.5	17.0601
314.5	17.5663
316.5	14.8217
318.5	12.2521
320.5	10.6054
322.5	11.6246
324.5	13.4548
326.5	10.8
328.5	11.9443
330.5	13.3218
333.5	15.7345
335.5	15.9746
337.5	15.1412
339.5	17.1938
341.5	17.0898
343.5	17.2013
345.5	17.4432
347.5	14.7393
349.5	15.8417
351.5	15.0625
353.5	15.9469
355.5	14.3504
357.5	15.8728

## Sheet: dinosterol
depth	d2H dinosterol	stdev
1	-266.2	6.6
3	-266.8	3.3
4.5	-265.1	1.7
11	-276.6	2.8
14	-282	2
29	-266.2	3.9
39	-279.5	3.3
49	-267.2	6.6
59	-274.8	2.9
69	-267	2.1
79	-265.4	2.4
89	-263.5	4.1
99	-268.7	3.9
109	-266.1	2.3
135.79	-271.5	4
145.79	-274.9	4.9
151.5	-277.9	3.2
161.5	-280.9	3.9
171.5	-258.5	3.4
181.5	-277	4
191.5	-266.6	3.5
201.5	-273.8	2.2
211.5	-270.5	4
213.88	-275.3	3.6
221.5	-274.8	5.7
229.82	-259.042	2.83039
237.88	-264.624	2.47707
249.71	-292.8	4.7
259.71	-293.6	5.5
269.71	-286.2	2.3
279.71	-288.6	1
289.71	-284	3
299.71	-284.5	4.1
309.71	-286.3	4.2
310.36	-291.9	3.9
319.71	-275.6	5.6
320.36	-279.7	6.1
329.71	-294	1.4
330.36	-289.4	3.3
340.36	-293.3	2.2
350.36	-292.1	4.2

## Sheet: itrax
depth	Ti/mo.inc
20.5	0.000907323
20.52	0
20.54	0
20.56	0
20.58	0.000316832
20.6	0.000331422
20.62	0
20.64	0
20.66	0
20.68	0.000259917
20.7	0.000640543
20.72	0
20.74	0
20.76	0
20.78	0.000255244
20.8	0
20.82	9.94361e-05
20.84	0.000182093
20.86	8.39678e-05
20.88	0
20.9	0
20.92	0
20.94	0.000182211
20.96	0.000455777
20.98	0.000136916
21	0
21.02	6.08961e-05
21.04	0.00136403
21.06	0.00284725
21.08	0.00509504
21.1	0.00465453
21.12	0.00260837
21.14	0.00264215
21.16	0.00348152
21.18	0.00369611
21.2	0.00627848
21.22	0.00903384
21.24	0.00996003
21.26	0.00858384
21.28	0.00887765
21.3	0.00901472
21.32	0.0117738
21.34	0.0155365
21.36	0.0110986
21.38	0.0117208
21.4	0.0130811
21.42	0.0116515
21.44	0.0138476
21.46	0.0123104
21.48	0.0145813
21.5	0.0170883
21.52	0.017801
21.54	0.0181989
21.56	0.0180241
21.58	0.0175406
21.6	0.017391
21.62	0.0184277
21.64	0.0189429
21.66	0.0211898
21.68	0.022312
21.7	0.0261129
21.72	0.0289461
21.74	0.0234805
21.76	0.0227494
21.78	0.0252461
21.8	0.0249952
21.82	0.0231095
21.84	0.0224136
21.86	0.0229543
21.88	0.0227762
21.9	0.023166
21.92	0.0236333
21.94	0.0233361
21.96	0.0249593
21.98	0.0275642
22	0.0265054
22.02	0.0257515
22.04	0.0287713
22.06	0.0301412
22.08	0.0306333
22.1	0.0293029
22.12	0.0303622
22.14	0.0310422
22.16	0.0296419
22.18	0.0291804
22.2	0.0269438
22.22	0.0278178
22.24	0.0259246
22.26	0.0260862
22.28	0.0246655
22.3	0.0236362
22.32	0.0218363
22.34	0.0204447
22.36	0.022412
22.38	0.0234374
22.4	0.0243612
22.42	0.0237967
22.44	0.0237414
22.46	0.0245167
22.48	0.0248345
22.5	0.0280116
22.52	0.0264807
22.54	0.0240391
22.56	0.0210021
22.58	0.0206517
22.6	0.0208848
22.62	0.0210676
22.64	0.018657
22.66	0.0176174
22.68	0.0193517
22.7	0.0196503
22.72	0.0198764
22.74	0.018228
22.76	0.0149686
22.78	0.0106079
22.8	0.00768698
22.82	0.00726209
22.84	0.00823536
22.86	0.00764878
22.88	0.00734605
22.9	0.00693996
22.92	0.00524659
22.94	0.00627483
22.96	0.00891571
22.98	0.00754974
23	0.00802745
23.02	0.00935178
23.04	0.00968112
23.06	0.0105222
23.08	0.0131231
23.1	0.0119658
23.12	0.0141063
23.14	0.0142643
23.16	0.0139718
23.18	0.0143564
23.2	0.0137249
23.22	0.0157914
23.24	0.0189277
23.26	0.0214662
23.28	0.0185163
23.3	0.0179403
23.32	0.0169719
23.34	0.015976
23.36	0.0179924
23.38	0.0190708
23.4	0.0217727
23.42	0.0204546
23.44	0.0206486
23.46	0.0209949
23.48	0.020931
23.5	0.0198237
23.52	0.0195814
23.54	0.0189575
23.56	0.0190407
23.58	0.0191304
23.6	0.0200294
23.62	0.0196502
23.64	0.0179002
23.66	0.0171502
23.68	0.0149657
23.7	0.0162489
23.72	0.0167906
23.74	0.0190697
23.76	0.021523
23.78	0.0213463
23.8	0.0216074
23.82	0.0242391
23.84	0.0255524
23.86	0.0279135
23.88	0.0255373
23.9	0.0251344
23.92	0.0246107
23.94	0.0252283
23.96	0.0251802
23.98	0.0281923
24	0.0271003
24.02	0.0252807
24.04	0.0256823
24.06	0.0246833
24.08	0.0243585
24.1	0.0238165
24.12	0.0234103
24.14	0.0232158
24.16	0.0212966
24.18	0.0185488
24.2	0.0177463
24.22	0.0165239
24.24	0.0158178
24.26	0.012624
24.28	0.0121516
24.3	0.0119722
24.32	0.0104276
24.34	0.00865119
24.36	0.00691329
24.38	0.00550631
24.4	0.00529669
24.42	0.00481035
24.44	0.00383259
24.46	0.00407016
24.48	0.00456249
24.5	0.00593106
24.52	0.00620058
24.54	0.00458569
24.56	0.00308571
24.58	0.00282237
24.6	0.00262442
24.62	0.00256722
24.64	0.00396879
24.66	0.00262478
24.68	0.00251574
24.7	0.00216406
24.72	0.00244209
24.74	0.0028578
24.76	0.00303836
24.78	0.00332561
24.8	0.0028864
24.82	0.00295501
24.84	0.00303251
24.86	0.00367735
24.88	0.00427224
24.9	0.0054236
24.92	0.0059941
24.94	0.00619088
24.96	0.00545501
24.98	0.00568306
25	0.00549525
25.02	0.00610329
25.04	0.00587512
25.06	0.0063978
25.08	0.00591411
25.1	0.00641613
25.12	0.00751071
25.14	0.00774775
25.16	0.00614626
25.18	0.0051612
25.2	0.00545608
25.22	0.00364063
25.24	0.0016173
25.26	0.00270398
25.28	0.00257217
25.3	0.00305374
25.32	0.00341383
25.34	0.00337435
25.36	0.00484162
25.38	0.00542704
25.4	0.00740763
25.42	0.00866877
25.44	0.00943102
25.46	0.0107573
25.48	0.0117803
25.5	0.0115452
25.52	0.0120118
25.54	0.0129508
25.56	0.0125015
25.58	0.0115894
25.6	0.0112786
25.62	0.0112765
25.64	0.010937
25.66	0.0103213
25.68	0.010597
25.7	0.0115966
25.72	0.0113525
25.74	0.0116493
25.76	0.0111764
25.78	0.0118712
25.8	0.0118236
25.82	0.0107144
25.84	0.0106981
25.86	0.00876389
25.88	0.00878681
25.9	0.0098814
25.92	0.00936957
25.94	0.00888132
25.96	0.00961608
25.98	0.00984433
26	0.0091355
26.02	0.0088273
26.04	0.00916062
26.06	0.00928451
26.08	0.0081176
26.1	0.00795983
26.12	0.00816815
26.14	0.00875012
26.16	0.0100102
26.18	0.00936413
26.2	0.0108021
26.22	0.0106535
26.24	0.0112383
26.26	0.0111542
26.28	0.0117577
26.3	0.0111091
26.32	0.0109297
26.34	0.0108027
26.36	0.0112472
26.38	0.0112246
26.4	0.0113729
26.42	0.00963223
26.44	0.0101221
26.46	0.0102498
26.48	0.0101207
26.5	0.0113397
26.52	0.0117032
26.54	0.0102927
26.56	0.0105571
26.58	0.0102818
26.6	0.00906146
26.62	0.00837967
26.64	0.00752959
26.66	0.00657678
26.68	0.00665559
26.7	0.00785065
26.72	0.00827933
26.74	0.00820813
26.76	0.00882324
26.78	0.00874461
26.8	0.00864068
26.82	0.0104803
26.84	0.0103772
26.86	0.0107218
26.88	0.0105861
26.9	0.0106836
26.92	0.01033
26.94	0.0111191
26.96	0.0107534
26.98	0.0119398
27	0.0117257
27.02	0.0124676
27.04	0.0122182
27.06	0.0119296
27.08	0.0129706
27.1	0.0139939
27.12	0.0135609
27.14	0.0129531
27.16	0.0141896
27.18	0.0152857
27.2	0.0138157
27.22	0.0142312
27.24	0.0131399
27.26	0.0134116
27.28	0.0117484
27.3	0.01226
27.32	0.0117876
27.34	0.0117236
27.36	0.0137761
27.38	0.0131657
27.4	0.0125457
27.42	0.0111881
27.44	0.0116437
27.46	0.0114973
27.48	0.0106388
27.5	0.0104565
27.52	0.00993427
27.54	0.0109356
27.56	0.0109729
27.58	0.0102338
27.6	0.00938188
27.62	0.0107111
27.64	0.0116497
27.66	0.0118394
27.68	0.0117237
27.7	0.0110413
27.72	0.0105707
27.74	0.0116352
27.76	0.0126941
27.78	0.0128613
27.8	0.0128426
27.82	0.0114837
27.84	0.0112857
27.86	0.0121082
27.88	0.011451
27.9	0.00939561
27.92	0.00871128
27.94	0.00769258
27.96	0.00720067
27.98	0.00940852
28	0.00968212
28.02	0.00958175
28.04	0.00779174
28.06	0.00790664
28.08	0.00772696
28.1	0.00844075
28.12	0.00906407
28.14	0.00812762
28.16	0.00874367
28.18	0.00868484
28.2	0.00913273
28.22	0.0103266
28.24	0.0115257
28.26	0.0131168
28.28	0.0143953
28.3	0.0141105
28.32	0.0142083
28.34	0.0149633
28.36	0.0160373
28.38	0.0164483
28.4	0.0159544
28.42	0.0149237
28.44	0.0133226
28.46	0.0118011
28.48	0.0114871
28.5	0.0100301
28.52	0.0117273
28.54	0.0116041
28.56	0.0111394
28.58	0.0106744
28.6	0.0112998
28.62	0.0116163
28.64	0.0126948
28.66	0.0124007
28.68	0.0122716
28.7	0.0130425
28.72	0.0127739
28.74	0.0115924
28.76	0.0122502
28.78	0.0126437
28.8	0.011656
28.82	0.012075
28.84	0.0123399
28.86	0.0121518
28.88	0.0153205
28.9	0.0154539
28.92	0.0171707
28.94	0.0180202
28.96	0.019323
28.98	0.0203872
29	0.0203924
29.02	0.0193741
29.04	0.020774
29.06	0.0209319
29.08	0.0219696
29.1	0.0216107
29.12	0.0203805
29.14	0.0211701
29.16	0.0216639
29.18	0.0219076
29.2	0.0239401
29.22	0.0242893
29.24	0.0233459
29.26	0.0236084
29.28	0.0251515
29.3	0.0248891
29.32	0.0243925
29.34	0.0251777
29.36	0.0245849
29.38	0.0243588
29.4	0.0258295
29.42	0.0251254
29.44	0.0239688
29.46	0.0234674
29.48	0.0227809
29.5	0.0233789
29.52	0.0239821
29.54	0.0223795
29.56	0.0219749
29.58	0.0210779
29.6	0.0207988
29.62	0.0196173
29.64	0.0204998
29.66	0.0207349
29.68	0.0207571
29.7	0.0222765
29.72	0.022999
29.74	0.0242252
29.76	0.0241074
29.78	0.0252445
29.8	0.0257603
29.82	0.0250342
29.84	0.024345
29.86	0.0239945
29.88	0.0254799
29.9	0.0253371
29.92	0.0262748
29.94	0.0242635
29.96	0.0251067
29.98	0.0257654
30	0.0247584
30.02	0.0251795
30.04	0.0257842
30.06	0.0260458
30.08	0.0274993
30.1	0.0276677
30.12	0.0285325
30.14	0.0264326
30.16	0.0255687
30.18	0.0274747
30.2	0.0268301
30.22	0.0266598
30.24	0.027604
30.26	0.028284
30.28	0.0263884
30.3	0.0265497
30.32	0.0276411
30.34	0.0271676
30.36	0.0274911
30.38	0.0292195
30.4	0.0261384
30.42	0.0255533
30.44	0.0269212
30.46	0.0268089
30.48	0.0280271
30.5	0.0265404
30.52	0.0272896
30.54	0.0286232
30.56	0.0277526
30.58	0.0291729
30.6	0.0277256
30.62	0.0274794
30.64	0.0278714
30.66	0.0291216
30.68	0.0296563
30.7	0.0282152
30.72	0.0278372
30.74	0.0259005
30.76	0.0236418
30.78	0.0236449
30.8	0.0236232
30.82	0.0221058
30.84	0.0220015
30.86	0.0231714
30.88	0.0214662
30.9	0.0219704
30.92	0.0227695
30.94	0.0207824
30.96	0.0213164
30.98	0.0211529
31	0.0190019
31.02	0.0177292
31.04	0.0173369
31.06	0.0173571
31.08	0.0166816
31.1	0.0155876
31.12	0.0143835
31.14	0.0147043
31.16	0.0139229
31.18	0.0125496
31.2	0.0107635
31.22	0.0112248
31.24	0.0128599
31.26	0.0133534
31.28	0.015701
31.3	0.0182731
31.32	0.0189781
31.34	0.0213323
31.36	0.0212545
31.38	0.0206601
31.4	0.0212206
31.42	0.0212995
31.44	0.0220752
31.46	0.0236429
31.48	0.0243687
31.5	0.0236574
31.52	0.0229983
31.54	0.0232794
31.56	0.0258007
31.58	0.0266769
31.6	0.0258698
31.62	0.0262287
31.64	0.023961
31.66	0.0244453
31.68	0.0239805
31.7	0.0242896
31.72	0.0235508
31.74	0.0236654
31.76	0.0243821
31.78	0.0251046
31.8	0.0249416
31.82	0.0248076
31.84	0.0238846
31.86	0.0240032
31.88	0.024711
31.9	0.0253911
31.92	0.0270064
31.94	0.028245
31.96	0.0302986
31.98	0.0290888
32	0.0282319
32.02	0.0279066
32.04	0.0260194
32.06	0.0264298
32.08	0.0261033
32.1	0.0270936
32.12	0.0271043
32.14	0.027604
32.16	0.02774
32.18	0.0289194
32.2	0.0287106
32.22	0.0283491
32.24	0.0276528
32.26	0.0274416
32.28	0.0284369
32.3	0.0269342
32.32	0.027992
32.34	0.0278593
32.36	0.0264753
32.38	0.0246727
32.4	0.0253107
32.42	0.0245738
32.44	0.0224561
32.46	0.0208052
32.48	0.0205151
32.5	0.0205195
32.52	0.020264
32.54	0.0174073
32.56	0.0164207
32.58	0.014904
32.6	0.0136713
32.62	0.0113985
32.64	0.0120222
32.66	0.0123063
32.68	0.0136862
32.7	0.0148403
32.72	0.0158779
32.74	0.0156772
32.76	0.0165125
32.78	0.0173071
32.8	0.0174323
32.82	0.0183767
32.84	0.0181881
32.86	0.0192217
32.88	0.0189846
32.9	0.0194161
32.92	0.0203188
32.94	0.0204159
32.96	0.0203488
32.98	0.0208805
33	0.0213879
33.02	0.022975
33.04	0.0227034
33.06	0.0213785
33.08	0.0198433
33.1	0.0168766
33.12	0.0152413
33.14	0.0163047
33.16	0.020256
33.18	0.0235833
33.2	0.022447
33.22	0.0220259
33.24	0.0231285
33.26	0.0214678
33.28	0.0244321
33.3	0.0242113
33.32	0.02547
33.34	0.0247907
33.36	0.0260324
33.38	0.0249917
33.4	0.0250689
33.42	0.0251012
33.44	0.0255743
33.46	0.0244541
33.48	0.0267003
33.5	0.0281937
33.52	0.0279293
33.54	0.0286712
33.56	0.0290306
33.58	0.029374
33.6	0.028693
33.62	0.0283194
33.64	0.0281898
33.66	0.0291659
33.68	0.0299648
33.7	0.0305742
33.72	0.0313771
33.74	0.0301408
33.76	0.0289388
33.78	0.028834
33.8	0.0277344
33.82	0.0268353
33.84	0.0272114
33.86	0.0253986
33.88	0.0272741
33.9	0.0287124
33.92	0.0278616
33.94	0.0263726
33.96	0.0267879
33.98	0.0272695
34	0.0267927
34.02	0.0272018
34.04	0.0263445
34.06	0.0270087
34.08	0.0286694
34.1	0.0262009
34.12	0.0263228
34.14	0.0260225
34.16	0.0246737
34.18	0.026248
34.2	0.0268488
34.22	0.0281052
34.24	0.0271692
34.26	0.0238934
34.28	0.0224764
34.3	0.0246922
34.32	0.0272383
34.34	0.0239666
34.36	0.0196318
34.38	0.0198996
34.4	0.0201437
34.42	0.0204566
34.44	0.0202682
34.46	0.0206111
34.48	0.0188248
34.5	0.0182463
34.52	0.0178679
34.54	0.0191207
34.56	0.0189484
34.58	0.0215957
34.6	0.0218424
34.62	0.0224944
34.64	0.0236416
34.66	0.0229797
34.68	0.0245507
34.7	0.0233687
34.72	0.0241526
34.74	0.0238094
34.76	0.0251979
34.78	0.0249953
34.8	0.0269144
34.82	0.02576
34.84	0.0263798
34.86	0.0269667
34.88	0.0266056
34.9	0.0266164
34.92	0.0274522
34.94	0.0269026
34.96	0.0261187
34.98	0.0274577
35	0.0284987
35.02	0.029106
35.04	0.0287193
35.06	0.0272707
35.08	0.0285898
35.1	0.0294541
35.12	0.0303249
35.14	0.031235
35.16	0.0291939
35.18	0.0276718
35.2	0.024901
35.22	0.02554
35.24	0.0265446
35.26	0.0268042
35.28	0.0247639
35.3	0.0246276
35.32	0.0275345
35.34	0.0260651
35.36	0.0259526
35.38	0.0258458
35.4	0.0261715
35.42	0.0261616
35.44	0.0277652
35.46	0.0268711
35.48	0.0256891
35.5	0.0244089
35.52	0.0235692
35.54	0.0244945
35.56	0.0249883
35.58	0.0245309
35.6	0.0245788
35.62	0.0246589
35.64	0.0238759
35.66	0.0235943
35.68	0.0198614
35.7	0.0192081
35.72	0.0198067
35.74	0.0199416
35.76	0.023705
35.78	0.021954
35.8	0.02266
35.82	0.023824
35.84	0.0240713
35.86	0.0257993
35.88	0.0240131
35.9	0.0216925
35.92	0.0225341
35.94	0.0219838
35.96	0.0229098
35.98	0.0245491
36	0.0239673
36.02	0.0219782
36.04	0.0213402
36.06	0.0222109
36.08	0.023838
36.1	0.0239695
36.12	0.0251925
36.14	0.0247648
36.16	0.0239532
36.18	0.0240512
36.2	0.0234972
36.22	0.0239994
36.24	0.0264636
36.26	0.0278223
36.28	0.0265033
36.3	0.0263116
36.32	0.0243349
36.34	0.0250797
36.36	0.0246798
36.38	0.0250964
36.4	0.0255485
36.42	0.0263349
36.44	0.0271681
36.46	0.0282761
36.48	0.0262823
36.5	0.0269922
36.52	0.0273287
36.54	0.0268903
36.56	0.0269555
36.58	0.0286532
36.6	0.0287633
36.62	0.0290064
36.64	0.0283864
36.66	0.0280721
36.68	0.0277367
36.7	0.0294108
36.72	0.0288114
36.74	0.029808
36.76	0.029105
36.78	0.0282729
36.8	0.0285854
36.82	0.0280855
36.84	0.0289495
36.86	0.0302449
36.88	0.0328355
36.9	0.027901
36.92	0.0245609
36.94	0.0234612
36.96	0.0251353
36.98	0.0282434
37	0.0259299
37.02	0.0260156
37.04	0.0283276
37.06	0.0295268
37.08	0.0293126
37.1	0.0285192
37.12	0.0282076
37.14	0.0268629
37.16	0.0277299
37.18	0.0294704
37.2	0.0288499
37.22	0.0285876
37.24	0.0296051
37.26	0.0306395
37.28	0.029063
37.3	0.0273599
37.32	0.0271513
37.34	0.0242528
37.36	0.0255555
37.38	0.0282697
37.4	0.0286851
37.42	0.0294484
37.44	0.0279937
37.46	0.0273479
37.48	0.0274079
37.5	0.0287899
37.52	0.0307584
37.54	0.0303826
37.56	0.033134
37.58	0.0317127
37.6	0.0292317
37.62	0.0304086
37.64	0.0313464
37.66	0.0301149
37.68	0.0311616
37.7	0.0323535
37.72	0.0303747
37.74	0.0295087
37.76	0.0287919
37.78	0.0302992
37.8	0.0299622
37.82	0.0293459
37.84	0.0288277
37.86	0.029408
37.88	0.0297776
37.9	0.0315921
37.92	0.0308002
37.94	0.0304063
37.96	0.0305192
37.98	0.0305846
38	0.0302468
38.02	0.0304557
38.04	0.0297605
38.06	0.0301616
38.08	0.0318377
38.1	0.0325604
38.12	0.0328075
38.14	0.0315489
38.16	0.0303098
38.18	0.0294859
38.2	0.0304686
38.22	0.0316011
38.24	0.0296933
38.26	0.0322265
38.28	0.0330751
38.3	0.0321961
38.32	0.0319906
38.34	0.0301193
38.36	0.0262405
38.38	0.0259789
38.4	0.028222
38.42	0.0287786
38.44	0.0305893
38.46	0.0302348
38.48	0.030587
38.5	0.031026
38.52	0.0309503
38.54	0.0307268
38.56	0.0306445
38.58	0.0314607
38.6	0.031681
38.62	0.031949
38.64	0.0307612
38.66	0.0300185
38.68	0.030609
38.7	0.0307946
38.72	0.0311229
38.74	0.0309474
38.76	0.0306586
38.78	0.0311301
38.8	0.0320118
38.82	0.0304129
38.84	0.031356
38.86	0.0322261
38.88	0.0309143
38.9	0.0319494
38.92	0.0321872
38.94	0.0319546
38.96	0.0322745
38.98	0.0326797
39	0.0311126
39.02	0.0318884
39.04	0.0301119
39.06	0.0314094
39.08	0.0334878
39.1	0.0322317
39.12	0.0317336
39.14	0.0318695
39.16	0.0312799
39.18	0.0319988
39.2	0.0318474
39.22	0.030101
39.24	0.0306654
39.26	0.0302313
39.28	0.0304476
39.3	0.0308395
39.32	0.0323728
39.34	0.0325202
39.36	0.0318518
39.38	0.0318599
39.4	0.0324915
39.42	0.0306323
39.44	0.0280546
39.46	0.0290067
39.48	0.028369
39.5	0.029391
39.52	0.0307728
39.54	0.02976
39.56	0.0315782
39.58	0.0304777
39.6	0.0298616
39.62	0.0295557
39.64	0.0303357
39.66	0.0291807
39.68	0.0319199
39.7	0.0311848
39.72	0.0314404
39.74	0.0286677
39.76	0.0291976
39.78	0.0289757
39.8	0.029779
39.82	0.0289142
39.84	0.0299366
39.86	0.0299196
39.88	0.0298208
39.9	0.0305137
39.92	0.02949
39.94	0.029198
39.96	0.0302357
39.98	0.0304121
40	0.0309557
40.02	0.030203
40.04	0.0311879
40.06	0.0292934
40.08	0.0298467
40.1	0.0296132
40.12	0.0298842
40.14	0.0296511
40.16	0.0294038
40.18	0.0295297
40.2	0.0290545
40.22	0.0284517
40.24	0.0288061
40.26	0.0285467
40.28	0.0280111
40.3	0.0270423
40.32	0.026758
40.34	0.0279188
40.36	0.0284102
40.38	0.0275134
40.4	0.0269152
40.42	0.0263858
40.44	0.0265342
40.46	0.0260752
40.48	0.0253969
40.5	0.0263091
40.52	0.0257027
40.54	0.0266485
40.56	0.0262231
40.58	0.0262592
40.6	0.0265324
40.62	0.026271
40.64	0.0257585
40.66	0.0260605
40.68	0.0255366
40.7	0.0261507
40.72	0.0260705
40.74	0.0265296
40.76	0.0258813
40.78	0.0252865
40.8	0.0262085
40.82	0.0255842
40.84	0.0271605
40.86	0.027784
40.88	0.0248895
40.9	0.025154
40.92	0.0251305
40.94	0.0241875
40.96	0.0225217
40.98	0.0238694
41	0.0251568
41.02	0.0233201
41.04	0.0231368
41.06	0.0247955
41.08	0.0226132
41.1	0.0229943
41.12	0.0227388
41.14	0.022209
41.16	0.023003
41.18	0.0233467
41.2	0.0245438
41.22	0.0232991
41.24	0.0235823
41.26	0.0236234
41.28	0.023201
41.3	0.0226093
41.32	0.0236485
41.34	0.0234786
41.36	0.0232288
41.38	0.0236441
41.4	0.0235935
41.42	0.023758
41.44	0.0233123
41.46	0.0235929
41.48	0.0235249
41.5	0.02347
41.52	0.0243219
41.54	0.0229189
41.56	0.0221778
41.58	0.0216527
41.6	0.0220597
41.62	0.0232047
41.64	0.0215153
41.66	0.0234909
41.68	0.0247458
41.7	0.0231807
41.72	0.0244977
41.74	0.0259871
41.76	0.0252616
41.78	0.0263707
41.8	0.025987
41.82	0.02603
41.84	0.0240755
41.86	0.024601
41.88	0.0244688
41.9	0.0249242
41.92	0.0237938
41.94	0.0246168
41.96	0.0243233
41.98	0.0248482
42	0.0240159
42.02	0.023845
42.04	0.0239854
42.06	0.0225218
42.08	0.0224345
42.1	0.0219819
42.12	0.0218114
42.14	0.0231039
42.16	0.022679
42.18	0.0242367
42.2	0.023963
42.22	0.0222306
42.24	0.0220571
42.26	0.0213992
42.28	0.0211562
42.3	0.020337
42.32	0.0214243
42.34	0.0236912
42.36	0.0241171
42.38	0.0239614
42.4	0.021949
42.42	0.0204402
42.44	0.0211473
42.46	0.0219377
42.48	0.023089
42.5	0.0238114
42.52	0.0232566
42.54	0.0216905
42.56	0.0240213
42.58	0.0245298
42.6	0.0230319
42.62	0.0215076
42.64	0.0225137
42.66	0.0221034
42.68	0.024486
42.7	0.0247911
42.72	0.0221047
42.74	0.0224042
42.76	0.0227927
42.78	0.0228256
42.8	0.0193146
42.82	0.0195778
42.84	0.0196365
42.86	0.0207314
42.88	0.0221112
42.9	0.0226674
42.92	0.0243106
42.94	0.0243164
42.96	0.0251872
42.98	0.026031
43	0.0239503
43.02	0.0247186
43.04	0.0248378
43.06	0.0253162
43.08	0.0259937
43.1	0.0253534
43.12	0.0283364
43.14	0.0310832
43.16	0.0261679
43.18	0.0255006
43.2	0.0259541
43.22	0.026259
43.24	0.0283701
43.26	0.0269838
43.28	0.0274287
43.3	0.0280412
43.32	0.0276128
43.34	0.021534
43.36	0.0198123
43.38	0.0213462
43.4	0.0214414
43.42	0.0214527
43.44	0.022602
43.46	0.0214273
43.48	0.0212198
43.5	0.0209853
43.52	0.0212626
43.54	0.0217682
43.56	0.0201908
43.58	0.0223822
43.6	0.0249079
43.62	0.022175
43.64	0.0245812
43.66	0.0250703
43.68	0.0257576
43.7	0.0252757
43.72	0.0257229
43.74	0.0255275
43.76	0.026174
43.78	0.0248623
43.8	0.0270893
43.82	0.0249759
43.84	0.0265039
43.86	0.0266823
43.88	0.0250749
43.9	0.0252284
43.92	0.0270502
43.94	0.02569
43.96	0.025132
43.98	0.025051
44	0.0273875
44.02	0.0281883
44.04	0.0283877
44.06	0.0307844
44.08	0.0295786
44.1	0.0290327
44.12	0.0286685
44.14	0.030017
44.16	0.0297489
44.18	0.0269943
44.2	0.0246422
44.22	0.0244533
44.24	0.0250961
44.26	0.0255271
44.28	0.0256295
44.3	0.0249223
44.32	0.0234731
44.34	0.0218919
44.36	0.0210916
44.38	0.0207673
44.4	0.0196493
44.42	0.0211666
44.44	0.0225026
44.46	0.0252639
44.48	0.0231261
44.5	0.0231599
44.52	0.0232519
44.54	0.0230626
44.56	0.02377
44.58	0.0269715
44.6	0.0295385
44.62	0.0274153
44.64	0.0252294
44.66	0.0221408
44.68	0.0247855
44.7	0.0263132
44.72	0.0263438
44.74	0.0287232
44.76	0.0283271
44.78	0.0271982
44.8	0.0262013
44.82	0.0262805
44.84	0.0256777
44.86	0.0271669
44.88	0.0268129
44.9	0.0276897
44.92	0.0277541
44.94	0.0292092
44.96	0.0294976
44.98	0.0318661
45	0.0296215
45.02	0.0279182
45.04	0.0261912
45.06	0.0267491
45.08	0.0271332
45.1	0.0281959
45.12	0.0283644
45.14	0.0311696
45.16	0.0303202
45.18	0.0303171
45.2	0.0285927
45.22	0.030803
45.24	0.0289391
45.26	0.0284008
45.28	0.0304837
45.3	0.031806
45.32	0.0320565
45.34	0.0309174
45.36	0.0303965
45.38	0.0290705
45.4	0.0288733
45.42	0.027363
45.44	0.0277446
45.46	0.0280066
45.48	0.0270383
45.5	0.0279925
45.52	0.0282476
45.54	0.0284813
45.56	0.0278919
45.58	0.0310357
45.6	0.0292932
45.62	0.029694
45.64	0.0301124
45.66	0.0283068
45.68	0.028737
45.7	0.030269
45.72	0.029474
45.74	0.0285426
45.76	0.0272447
45.78	0.0278342
45.8	0.0264843
45.82	0.026065
45.84	0.030403
45.86	0.0288763
45.88	0.0284306
45.9	0.0285014
45.92	0.0312178
45.94	0.0284521
45.96	0.0286826
45.98	0.0285531
46	0.0270279
46.02	0.0283358
46.04	0.0272689
46.06	0.0274641
46.08	0.0273869
46.1	0.0284733
46.12	0.0279564
46.14	0.0274118
46.16	0.0282581
46.18	0.0278682
46.2	0.0287701
46.22	0.0295277
46.24	0.028603
46.26	0.028844
46.28	0.0286667
46.3	0.0270988
46.32	0.028189
46.34	0.0284981
46.36	0.0292136
46.38	0.0304438
46.4	0.0292576
46.42	0.0289478
46.44	0.0281035
46.46	0.0282884
46.48	0.02922
46.5	0.0293171
46.52	0.0302183
46.54	0.0295179
46.56	0.0290911
46.58	0.0288614
46.6	0.0276111
46.62	0.0266686
46.64	0.0261137
46.66	0.0261199
46.68	0.0279785
46.7	0.0300125
46.72	0.0320233
46.74	0.0277361
46.76	0.0276593
46.78	0.0265364
46.8	0.0288913
46.82	0.031103
46.84	0.0319382
46.86	0.0292367
46.88	0.0289988
46.9	0.0266855
46.92	0.0268759
46.94	0.0272519
46.96	0.0283571
46.98	0.0273407
47	0.0257111
47.02	0.0273792
47.04	0.0279441
47.06	0.0275524
47.08	0.027053
47.1	0.0272405
47.12	0.0261037
47.14	0.0258683
47.16	0.0266293
47.18	0.0256731
47.2	0.0243579
47.22	0.0250221
47.24	0.0237598
47.26	0.0253317
47.28	0.0249795
47.3	0.0253583
47.32	0.0240496
47.34	0.021288
47.36	0.0208508
47.38	0.0191053
47.4	0.0192012
47.42	0.0190174
47.44	0.0213088
47.46	0.0210519
47.48	0.0229324
47.5	0.0245176
47.52	0.0270476
47.54	0.0293906
47.56	0.0290449
47.58	0.030955
47.6	0.0299675
47.62	0.0303229
47.64	0.030879
47.66	0.0324061
47.68	0.0322504
47.7	0.0329631
47.72	0.0300232
47.74	0.0280558
47.76	0.0255651
47.78	0.0259891
47.8	0.0265916
47.82	0.0262259
47.84	0.0276667
47.86	0.0257643
47.88	0.0241549
47.9	0.0259485
47.92	0.0271922
47.94	0.0289826
47.96	0.0268116
47.98	0.0265283
48	0.0276316
48.02	0.0271996
48.04	0.027259
48.06	0.0292392
48.08	0.0312647
48.1	0.0309767
48.12	0.0312043
48.14	0.0311653
48.16	0.0287188
48.18	0.0304314
48.2	0.0315566
48.22	0.031639
48.24	0.0306754
48.26	0.0283073
48.28	0.026307
48.3	0.020824
48.32	0.0210736
48.34	0.0216412
48.36	0.0195335
48.38	0.0211988
48.4	0.020988
48.42	0.023622
48.44	0.025871
48.46	0.0278379
48.48	0.0262614
48.5	0.027608
48.52	0.0274487
48.54	0.0264253
48.56	0.026179
48.58	0.0245873
48.6	0.0251106
48.62	0.0292968
48.64	0.0266083
48.66	0.0256547
48.68	0.0269097
48.7	0.0281283
48.72	0.0261648
48.74	0.0279718
48.76	0.028333
48.78	0.0294367
48.8	0.0283412
48.82	0.028867
48.84	0.0313089
48.86	0.0304974
48.88	0.0289798
48.9	0.0298359
48.92	0.0307309
48.94	0.0314286
48.96	0.0301791
48.98	0.0290633
49	0.0282715
49.02	0.0297335
49.04	0.0283357
49.06	0.0276479
49.08	0.0292134
49.1	0.0282553
49.12	0.026845
49.14	0.0272923
49.16	0.0293434
49.18	0.0311874
49.2	0.0301141
49.22	0.0317873
49.24	0.0313442
49.26	0.0291889
49.28	0.0300741
49.3	0.025799
49.32	0.0237333
49.34	0.0235453
49.36	0.0278552
49.38	0.0294198
49.4	0.0279156
49.42	0.0259944
49.44	0.0275285
49.46	0.0266037
49.48	0.0275922
49.5	0.0291405
49.52	0.0299034
49.54	0.0298746
49.56	0.0310683
49.58	0.0291031
49.6	0.0280251
49.62	0.0300485
49.64	0.0322105
49.66	0.030439
49.68	0.0310818
49.7	0.0324129
49.72	0.0331811
49.74	0.0323194
49.76	0.0292046
49.78	0.0294778
49.8	0.0288763
49.82	0.0287109
49.84	0.0268568
49.86	0.0284381
49.88	0.0288657
49.9	0.0292917
49.92	0.0280863
49.94	0.0288641
49.96	0.0304094
49.98	0.0319363
50	0.0308678
50.02	0.0295595
50.04	0.0298687
50.06	0.0285716
50.08	0.0272643
50.1	0.0282532
50.12	0.0273969
50.14	0.029498
50.16	0.030566
50.18	0.0308715
50.2	0.0308324
50.22	0.0308913
50.24	0.0309579
50.26	0.0333267
50.28	0.0345468
50.3	0.0370442
50.32	0.0324698
50.34	0.0294183
50.36	0.027269
50.38	0.028831
50.4	0.0285937
50.42	0.0259506
50.44	0.0255736
50.46	0.0261579
50.48	0.0279125
50.5	0.0282236
50.52	0.0267702
50.54	0.0259826
50.56	0.0257484
50.58	0.024379
50.6	0.0241704
50.62	0.0246735
50.64	0.0256358
50.66	0.026587
50.68	0.026256
50.7	0.0275574
50.72	0.0286393
50.74	0.0305531
50.76	0.0279585
50.78	0.0293835
50.8	0.0290147
50.82	0.0271697
50.84	0.0296886
50.86	0.0326675
50.88	0.0350461
50.9	0.0307094
50.92	0.0256319
50.94	0.0210019
50.96	0.0186567
50.98	0.0178294
51	0.0180111
51.02	0.0174284
51.04	0.0245083
51.06	0.0293785
51.08	0.0300883
51.1	0.0313927
51.12	0.0306204
51.14	0.0297413
51.16	0.0289294
51.18	0.0257237
51.2	0.0259815
51.22	0.0265199
51.24	0.0289244
51.26	0.0291619
51.28	0.0296984
51.3	0.0286506
51.32	0.0292564
51.34	0.0285192
51.36	0.0302466
51.38	0.0307568
51.4	0.0294818
51.42	0.0265853
51.44	0.0265378
51.46	0.0287697
51.48	0.0282734
51.5	0.0278017
51.52	0.0304807
51.54	0.0292237
51.56	0.0265733
51.58	0.0237642
51.6	0.0238701
51.62	0.0272514
51.64	0.0284692
51.66	0.0273727
51.68	0.029776
51.7	0.0300799
51.72	0.0291111
51.74	0.0267767
51.76	0.0290623
51.78	0.0311903
51.8	0.031423
51.82	0.0300239
51.84	0.029888
51.86	0.0301458
51.88	0.0305845
51.9	0.0283323
51.92	0.0289722
51.94	0.0302032
51.96	0.0310511
51.98	0.0272652
52	0.0258494
52.02	0.0278554
52.04	0.0279283
52.06	0.0291847
52.08	0.0300283
52.1	0.0297056
52.12	0.0293874
52.14	0.0300164
52.16	0.0300125
52.18	0.0268311
52.2	0.0289737
52.22	0.0279587
52.24	0.0274679
52.26	0.029088
52.28	0.0297092
52.3	0.0287205
52.32	0.0271486
52.34	0.0289419
52.36	0.027535
52.38	0.0268538
52.4	0.0269408
52.42	0.0265562
52.44	0.0271911
52.46	0.0279939
52.48	0.0277966
52.5	0.0275036
52.52	0.0250305
52.54	0.0239119
52.56	0.026782
52.58	0.0272404
52.6	0.0268415
52.62	0.0270145
52.64	0.0275198
52.66	0.0293423
52.68	0.0280001
52.7	0.0268821
52.72	0.0268548
52.74	0.0279654
52.76	0.0264402
52.78	0.0253892
52.8	0.0265121
52.82	0.0260506
52.84	0.0267793
52.86	0.0269279
52.88	0.0290106
52.9	0.0284019
52.92	0.0283647
52.94	0.0260724
52.96	0.0254706
52.98	0.0253466
53	0.0259075
53.02	0.0261358
53.04	0.0281868
53.06	0.0283107
53.08	0.0284496
53.1	0.0283953
53.12	0.0270869
53.14	0.027473
53.16	0.0271528
53.18	0.0272243
53.2	0.026475
53.22	0.0268186
53.24	0.0278446
53.26	0.0284038
53.28	0.028079
53.3	0.0290286
53.32	0.027238
53.34	0.0273887
53.36	0.0273001
53.38	0.0280572
53.4	0.0262726
53.42	0.0264421
53.44	0.0258006
53.46	0.0260201
53.48	0.0262799
53.5	0.0254978
53.52	0.023506
53.54	0.0254012
53.56	0.0275413
53.58	0.0275447
53.6	0.0264802
53.62	0.0275331
53.64	0.0280574
53.66	0.027371
53.68	0.0275347
53.7	0.026227
53.72	0.0271038
53.74	0.0258151
53.76	0.0264713
53.78	0.0255184
53.8	0.0257961
53.82	0.0262501
53.84	0.0256287
53.86	0.0242519
53.88	0.0241268
53.9	0.0243548
53.92	0.0252584
53.94	0.0242964
53.96	0.0241642
53.98	0.0240526
54	0.0249897
54.02	0.02505
54.04	0.0243269
54.06	0.0229475
54.08	0.0236137
54.1	0.0250257
54.12	0.025441
54.14	0.0275686
54.16	0.0240601
54.18	0.0249055
54.2	0.0241285
54.22	0.0247046
54.24	0.0259024
54.26	0.0252932
54.28	0.0244921
54.3	0.0241264
54.32	0.0260049
54.34	0.0265267
54.36	0.0274937
54.38	0.0277012
54.4	0.0272173
54.42	0.0266943
54.44	0.0255928
54.46	0.0261533
54.48	0.0251852
54.5	0.0258812
54.52	0.0264261
54.54	0.0266409
54.56	0.0256446
54.58	0.0243584
54.6	0.0250698
54.62	0.0257913
54.64	0.0251411
54.66	0.0251006
54.68	0.0245191
54.7	0.0247761
54.72	0.0241945
54.74	0.0201741
54.76	0.0206392
54.78	0.0221549
54.8	0.0220814
54.82	0.0242267
54.84	0.0245497
54.86	0.0260903
54.88	0.0262915
54.9	0.0277808
54.92	0.0278097
54.94	0.0259423
54.96	0.0277235
54.98	0.0272582
55	0.0267738
55.02	0.0262381
55.04	0.0256092
55.06	0.0262938
55.08	0.0263251
55.1	0.0275839
55.12	0.0266319
55.14	0.0246035
55.16	0.025255
55.18	0.0245353
55.2	0.0260636
55.22	0.0270209
55.24	0.0269658
55.26	0.0272596
55.28	0.0275552
55.3	0.0262727
55.32	0.0255837
55.34	0.0275782
55.36	0.0257036
55.38	0.0251186
55.4	0.0230526
55.42	0.0245162
55.44	0.0259496
55.46	0.0258255
55.48	0.0267298
55.5	0.0264208
55.52	0.0258764
55.54	0.0258513
55.56	0.0241094
55.58	0.02336
55.6	0.0222903
55.62	0.0237084
55.64	0.0243667
55.66	0.0254613
55.68	0.0254366
55.7	0.0267946
55.72	0.0261063
55.74	0.0257778
55.76	0.0261543
55.78	0.02539
55.8	0.0260803
55.82	0.0253123
55.84	0.0269359
55.86	0.0282139
55.88	0.0277047
55.9	0.0253949
55.92	0.0246454
55.94	0.022752
55.96	0.0221646
55.98	0.0207542
56	0.0229561
56.02	0.0239635
56.04	0.0251146
56.06	0.0252935
56.08	0.0238507
56.1	0.0251328
56.12	0.0246078
56.14	0.025253
56.16	0.0250175
56.18	0.0258421
56.2	0.0268911
56.22	0.0280975
56.24	0.0280242
56.26	0.0260656
56.28	0.0252825
56.3	0.0258661
56.32	0.0246978
56.34	0.0252698
56.36	0.0248081
56.38	0.0269924
56.4	0.0273968
56.42	0.0281246
56.44	0.0296932
56.46	0.0291121
56.48	0.0254386
56.5	0.0235521
56.52	0.0228572
56.54	0.0248287
56.56	0.0276443
56.58	0.0283209
56.6	0.0294713
56.62	0.0296691
56.64	0.0308338
56.66	0.0306041
56.68	0.0292186
56.7	0.0279154
56.72	0.0284017
56.74	0.027333
56.76	0.0275605
56.78	0.0285426
56.8	0.0269412
56.82	0.0272555
56.84	0.0248728
56.86	0.0229124
56.88	0.0246472
56.9	0.0241768
56.92	0.0245691
56.94	0.0255824
56.96	0.0233945
56.98	0.0255176
57	0.0241317
57.02	0.0239184
57.04	0.0241586
57.06	0.0243832
57.08	0.025248
57.1	0.0255565
57.12	0.0262957
57.14	0.0269846
57.16	0.025835
57.18	0.0256373
57.2	0.0277736
57.22	0.0275711
57.24	0.027074
57.26	0.0254142
57.28	0.027568
57.3	0.0268833
57.32	0.0247879
57.34	0.0259581
57.36	0.0262024
57.38	0.0249176
57.4	0.0250746
57.42	0.0256794
57.44	0.02707
57.46	0.0248492
57.48	0.0262723
57.5	0.0282409
57.52	0.0277048
57.54	0.0254229
57.56	0.0247331
57.58	0.0243833
57.6	0.0253302
57.62	0.0255969
57.64	0.0255171
57.66	0.0242351
57.68	0.0249132
57.7	0.0246386
57.72	0.0245865
57.74	0.0253454
57.76	0.0261956
57.78	0.0245794
57.8	0.024017
57.82	0.0232406
57.84	0.0237316
57.86	0.0252757
57.88	0.0266572
57.9	0.0269035
57.92	0.0273992
57.94	0.0256598
57.96	0.0263301
57.98	0.0276642
58	0.0270978
58.02	0.0252091
58.04	0.0249141
58.06	0.0247876
58.08	0.0245033
58.1	0.0251373
58.12	0.0252441
58.14	0.0257856
58.16	0.0242423
58.18	0.024341
58.2	0.0252817
58.22	0.0255032
58.24	0.0237811
58.26	0.024572
58.28	0.0253109
58.3	0.0260149
58.32	0.0269435
58.34	0.0270494
58.36	0.0260907
58.38	0.0275925
58.4	0.0262211
58.42	0.0254869
58.44	0.0269549
58.46	0.0266929
58.48	0.0264264
58.5	0.0256888
58.52	0.0261329
58.54	0.025965
58.56	0.0261199
58.58	0.0263113
58.6	0.0255424
58.62	0.0247967
58.64	0.0257456
58.66	0.0259231
58.68	0.027367
58.7	0.0282612
58.72	0.0277623
58.74	0.0242644
58.76	0.0224465
58.78	0.0235676
58.8	0.0239184
58.82	0.02596
58.84	0.02621
58.86	0.0271835
58.88	0.0271109
58.9	0.0277528
58.92	0.0270926
58.94	0.0270232
58.96	0.0260234
58.98	0.0268076
59	0.0265719
59.02	0.0261988
59.04	0.0279304
59.06	0.0276076
59.08	0.0286948
59.1	0.030582
59.12	0.0299225
59.14	0.0301639
59.16	0.0287121
59.18	0.0283748
59.2	0.0284636
59.22	0.0302063
59.24	0.0308535
59.26	0.0274695
59.28	0.0277026
59.3	0.0290216
59.32	0.0290154
59.34	0.0281906
59.36	0.0259492
59.38	0.0255203
59.4	0.0254706
59.42	0.02659
59.44	0.0281164
59.46	0.0280198
59.48	0.0268068
59.5	0.0274359
59.52	0.0300798
59.54	0.0286153
59.56	0.0274073
59.58	0.0271156
59.6	0.0289683
59.62	0.029286
59.64	0.0285989
59.66	0.0293617
59.68	0.0271127
59.7	0.0265763
59.72	0.0270965
59.74	0.0280029
59.76	0.0269855
59.78	0.0266969
59.8	0.0273004
59.82	0.0259228
59.84	0.0282165
59.86	0.0262134
59.88	0.02614
59.9	0.0286267
59.92	0.0291229
59.94	0.0291474
59.96	0.0302166
59.98	0.0298479
60	0.0295994
60.02	0.0300851
60.04	0.0293874
60.06	0.0288656
60.08	0.0288461
60.1	0.0280352
60.12	0.0283493
60.14	0.0269382
60.16	0.0285618
60.18	0.0310763
60.2	0.030023
60.22	0.0288787
60.24	0.0293811
60.26	0.0306177
60.28	0.0285272
60.3	0.029364
60.32	0.0294519
60.34	0.0282915
60.36	0.0285617
60.38	0.0284593
60.4	0.0294488
60.42	0.0290699
60.44	0.0289701
60.46	0.0263201
[truncated: 14,975 more rows]

## Sheet: macrocharcoal
depth	fragments per 1cm3
1	13
4	138
22	19
27	23
43	1
59	15
75	3
90	7
106	29
154	17
156	14
157	4
158	3
159	2
167	8
168	6
169	1
177	8
192	20
207	6
227	9
237	9
251	2
266	11
281	7
296	8
311	1
321	5
322	8
332	5
335	8
341	7

## Sheet: magnetic_susceptibility
depth	var
20.5	2.6298e-05
21.5	2.3976e-05
22.5	1.5962e-05
23.5	1.4964e-05
24.5	7.973e-06
25.5	1.6609e-05
26.5	5.86e-05
27.5	4.4046e-05
28.5	5.7974e-06
29.5	5.8319e-06
30.5	6.646e-06
31.5	9.0278e-06
32.5	1.061e-05
33.5	1.1164e-05
34.5	1.1223e-05
35.5	1.0979e-05
36.5	1.2656e-05
37.5	1.4771e-05
38.5	1.2978e-05
39.5	1.3793e-05
40.5	1.6689e-05
41.5	1.9337e-05
42.5	2.7289e-05
43.5	3.2531e-05
44.5	2.188e-05
45.5	1.514e-05
46.5	2.1425e-05
47.5	2.9013e-05
48.5	2.8524e-05
49.5	2.2789e-05
50.5	1.5563e-05
51.5	1.4034e-05
52.5	1.5113e-05
53.5	1.7229e-05
54.5	2.2993e-05
55.5	2.5667e-05
56.5	2.9566e-05
57.5	3.3038e-05
58.5	3.4837e-05
59.5	2.7117e-05
60.5	2.4026e-05
61.5	2.6678e-05
62.5	3.2443e-05
63.5	3.4824e-05
64.5	3.3037e-05
65.5	3.1245e-05
66.5	6.3233e-05
67.5	7.0412e-05
68.5	6.5292e-05
69.5	5.8554e-05
70.5	6.026e-05
71.5	4.0651e-05
72.5	4.1469e-05
73.5	3.8641e-05
74.5	3.8615e-05
75.5	4.1843e-05
76.5	3.7717e-05
77.5	3.2548e-05
78.5	3.8058e-05
79.5	5.271e-05
80.5	4.8839e-05
81.5	5.1139e-05
82.5	5.1005e-05
83.5	5.6242e-05
84.5	7.5588e-05
85.5	6.885e-05
86.5	4.5693e-05
87.5	5.0444e-05
88.5	5.8029e-05
89.5	6.9786e-05
90.5	6.6166e-05
91.5	6.5417e-05
92.5	9.2288e-05
93.5	8.9192e-05
94.5	6.9694e-05
95.5	7.2069e-05
96.5	7.6802e-05
97.5	7.9181e-05
98.5	7.7916e-05
99.5	5.5022e-05
100.5	4.8798e-05
101.5	5.2911e-05
102.5	4.2365e-05
103.5	4.4486e-05
104.5	4.1652e-05
105.5	3.5172e-05
106.5	4.8759e-05
107.5	5.2181e-05
108.5	2.9292e-05
109.5	2.6717e-05
110.5	2.6748e-05
111.5	2.7527e-05
112.5	3.0682e-05
113.5	2.8316e-05
114.5	4.0752e-05
115.5	5.5547e-05
116.5	6.8533e-05
117.5	8.5611e-05
118.5	9.9095e-05
119.5	8.4414e-05
120.5	7.3628e-05
121.5	8.8876e-05
122.5	8.824e-05
123.5	9.8342e-05
124.5	0.000106897
125.5	0.000116935
126.5	0.00011368
127.5	0.000100263
128.5	8.9223e-05
129.5	9.8537e-05
130.5	9.7122e-05
131.5	9.9887e-05
132.5	0.000112816
133.5	0.000102263
134.5	7.1735e-05
135.5	6.9321e-05
136.5	6.6384e-05
137.5	6.9404e-05
138.5	8.0773e-05
139.5	9.4852e-05
140.5	0.000110979
141.5	0.000123148
142.5	9.1749e-05
143.5	5.5927e-05
144.5	5.7274e-05
145.5	5.7997e-05
146.5	6.5894e-05
147.5	8.1522e-05
148.5	7.6313e-05
149.5	0.000103894
150.5	0.00011298
151.5	7.8024e-05
152.5	7.9029e-05
153.5	8.8112e-05
154.5	8.911e-05
155.5	0.000129448
156.5	0.000113785
157.5	9.7846e-05
158.5	0.000104326
159.5	0.000117569
160.5	0.000165197
161.5	0.000509561
162.5	0.00252228
163.5	0.00245841
164.5	0.000355732
165.5	0.000417169
166.5	0.000712291
167.5	0.000729184
168.5	0.000793715
169.5	0.00038856
170.5	0.000205373
171.5	0.000213142
172.5	0.000268067
173.5	0.000335995
174.5	0.000521702
175.5	0.0012136
176.5	0.00161189
177.5	0.000638736
178.5	0.000148967
179.5	0.00015522
180.5	0.000184783
181.5	6.8551e-05
182.5	4.9491e-05
183.5	5.6986e-05
184.5	6.6693e-05
185.5	7.0427e-05
186.5	6.7e-05
187.5	6.5391e-05
188.5	5.9095e-05
189.5	5.3578e-05
190.5	4.9351e-05
191.5	4.9288e-05
192.5	5.1851e-05
193.5	5.6757e-05
194.5	6.8177e-05
195.5	7.7521e-05
196.5	7.3476e-05
197.5	0.000111992
198.5	0.000194795
199.5	0.000117894
200.5	6.1057e-05
201.5	5.8667e-05
202.5	5.68e-05
203.5	4.8423e-05
204.5	4.0533e-05
205.5	3.9971e-05
206.5	3.8366e-05
207.5	3.649e-05
208.5	3.7229e-05
209.5	3.9502e-05
210.5	4.387e-05
211.5	5.178e-05
212.5	6.2544e-05
213.5	8.0996e-05
214.5	0.000110379
215.5	0.000112125
216.5	7.7982e-05
217.5	4.8505e-05
218.5	3.9862e-05
219.5	4.6076e-05
220.5	7.6226e-05
221.5	9.5415e-05
222.5	9.6705e-05
223.5	0.000107611
224.5	0.00012606
225.5	9.085e-05
226.5	8.7939e-05
227.5	8.1642e-05
228.5	7.5592e-05
229.5	8.7006e-05
230.5	9.2956e-05
231.5	9.8904e-05
232.5	0.000104897
233.5	9.1111e-05
234.5	7.5412e-05
235.5	0.000137015
236.5	0.000208183
237.5	0.000126141
238.5	4.0195e-05
239.5	4.7046e-05
240.5	5.1199e-05
241.5	5.6176e-05
242.5	5.6458e-05
243.5	4.6319e-05
244.5	5.0294e-05
245.5	8.7014e-05
246.5	0.000147486
247.5	5.5989e-05
248.5	6.1719e-05
249.5	4.9212e-05
250.5	4.5303e-05
251.5	5.1292e-05
252.5	5.3875e-05
253.5	4.0066e-05
254.5	4.1627e-05
255.5	5.0483e-05
256.5	6.079e-05
257.5	6.1159e-05
258.5	6.0113e-05
259.5	0.000120291
260.5	0.000177603
261.5	9.5538e-05
262.5	5.724e-05
263.5	4.9815e-05
264.5	5.7236e-05
265.5	4.487e-05
266.5	4.4324e-05
267.5	5.5145e-05
268.5	6.4001e-05
269.5	5.8528e-05
270.5	6.2694e-05
271.5	4.9927e-05
272.5	4.2631e-05
273.5	7.0673e-05
274.5	8.0663e-05
275.5	8.7695e-05
276.5	6.4609e-05
277.5	4.3402e-05
278.5	4.6265e-05
279.5	5.5502e-05
280.5	5.6161e-05
281.5	4.5217e-05
282.5	3.297e-05
283.5	3.2705e-05
284.5	2.7492e-05
285.5	3.0356e-05
286.5	3.4784e-05
287.5	3.0353e-05
288.5	4.3233e-05
289.5	6.7864e-05
290.5	7.316e-05
291.5	6.7763e-05
292.5	5.9262e-05
293.5	6.8899e-05
294.5	6.0821e-05
295.5	4.7533e-05
296.5	6.0297e-05
297.5	9.239e-05
298.5	9.3169e-05
299.5	8.3218e-05
300.5	8.7645e-05
301.5	0.00013115
302.5	0.000123593
303.5	6.914e-05
304.5	8.0599e-05
305.5	6.5488e-05
306.5	4.1518e-05
307.5	5.793e-05
308.5	9.9611e-05
309.5	0.000136342
310.5	0.000167603
311.5	0.000178283
312.5	6.8863e-05
313.5	4.5153e-05
314.5	5.7916e-05
315.5	0.000113156
316.5	0.000228292
317.5	0.000193381
318.5	9.3601e-05
319.5	7.875e-05
320.5	0.000173056
321.5	0.000254075
322.5	0.000129025
323.5	0.000144394
324.5	0.00024391
325.5	0.000211949
326.5	0.000189719
327.5	0.00017669
328.5	6.491e-05
329.5	8.5251e-05
330.5	8.0868e-05
331.5	6.2652e-05
332.5	7.5882e-05
333.5	0.000139025
334.5	0.000163293
335.5	9.4256e-05
336.5	4.6357e-05
337.5	3.9065e-05
338.5	4.2213e-05
339.5	0.000137323
340.5	0.000217323
341.5	0.000105319
342.5	9.3878e-05
343.5	6.4201e-05
344.5	4.3657e-05
345.5	3.2214e-05
346.5	5.7763e-05
347.5	8.4093e-05
348.5	6.4052e-05
349.5	5.7558e-05
350.5	7.1645e-05
351.5	8.1307e-05
352.5	7.4296e-05
353.5	8.0307e-05
354.5	6.9908e-05
355.5	6.9868e-05
356.5	6.422e-05
357.5	4.6008e-05
358.5	1.4245e-05

## Sheet: microcharcoal
depth	fragments per 1cm3
1	96820.6
4	443587
22	73850.8
27	30072
43	512298
59	494577
75	125658
90	30043
106	982066
154	3350880
156	1.04255e+06
157	992376
158	749115
159	2493828
167	1.4151e+06
168	63955.5
169	1852650
177	1.20632e+06
192	2126520
207	1350555
227	1.18841e+06
237	967586
251	20807.4
266	2.17678e+06
281	1.15605e+06
296	417800
311	2575989
321	64371.4
322	0
332	4024278
335	837720
341	440656

## Sheet: pollen_counts
depth	Rhizophora	Sonneratia	Arecaceae	Calamus	Cocos	Cf. Agathis	Anacardiaceae	Ascarina	Barringtonia	Cf. Burseraceae	Casuarina	Cannabaceae Cf. Celtis	Cf. Cyclophyllum	Elaeocarpaceae	Erythrina	Euphorbiaceae/ Rubiaceae	Excoecaria	Cf. Ficus	Cf. Freycinetia	Grewia	Cf. Guettarda	Hibiscus	Homalanthus	Leucaena	Cf. Loranthaceae	Macaranga	Meliaceae	Mimosoideae	Cf. Myrsinaceae	Pandanus	Phyllanthaceae	Piperaceae	Podocarpus	Cf. Rhamnaceae	Rhus	Sapindaceae	Sapotaceae	Myrtaceae Cf. Syzygium	Terminalia	Trema	Acalypha	Amaranthaceae	Cf.Araliaceae	Asteraceae	Cf. Brassicaceae	Cyperaceae	Euphorbiaceae	Lythraceae	Multipore Poaceae
1	0	0	1	0	0	0	0	0	0	0	0	0	0	1	0	1	0	0	0	0	0	0	0	0	0	36	0	0	0	4	0	0	0	2	0	0	2	1	0	1	50	0	0	14	0	13	2	0	0
4	0	0	0	0	0	0	0	0	1	0	0	0	0	0	0	0	0	0	0	0	0	0	1	0	0	1	0	0	0	3	0	0	0	0	0	0	0	0	0	0	6	0	0	8	0	7	0	0	0
22	0	0	1	1	0	0	0	0	1	0	0	0	0	0	0	2	0	0	0	0	0	0	0	0	0	63	0	1	0	17	0	0	0	0	0	0	3	1	0	2	13	0	0	5	0	1	0	0	0
27	0	0	1	3	0	1	0	0	1	0	3	0	0	4	0	0	0	0	0	0	0	1	1	0	0	80	0	0	0	83	1	0	0	0	0	3	2	0	0	8	371	0	0	1	1	69	0	0	0
43	0	0	2	0	0	0	0	2	0	0	3	0	0	3	0	3	0	0	0	0	0	2	0	0	0	97	0	0	0	66	0	0	0	0	0	8	9	1	0	14	86	0	0	1	0	13	0	0	2
59	0	0	0	0	0	0	0	2	4	0	6	1	0	0	0	4	0	1	0	0	0	2	4	1	0	64	0	0	0	45	0	0	0	0	0	2	25	0	0	32	38	0	0	0	0	6	0	0	0
75	0	0	1	0	0	0	0	1	1	1	2	2	0	0	0	4	0	0	0	0	0	0	4	0	0	80	0	0	0	32	0	0	0	0	0	3	6	1	0	48	58	0	0	1	0	9	0	0	0
90	0	1	1	1	2	0	0	0	1	0	13	1	0	1	1	0	0	0	0	0	1	0	5	2	0	74	0	0	0	38	0	0	3	0	0	8	0	3	1	43	80	0	0	1	0	52	0	0	2
106	0	0	0	0	0	0	0	0	0	0	3	1	0	0	0	1	0	0	0	0	0	0	9	0	0	64	0	0	0	22	0	0	0	0	0	3	3	0	1	36	63	0	0	2	0	13	0	0	0
154	0	0	2	0	0	0	0	0	1	0	1	0	1	0	0	9	0	0	0	0	0	1	3	0	0	87	0	0	1	49	0	0	0	0	0	1	3	0	0	10	11	1	0	5	1	7	0	0	0
156	0	0	0	0	0	0	0	0	4	0	12	0	0	1	2	2	0	1	0	0	0	2	23	1	2	134	0	0	0	41	0	1	0	0	0	6	6	2	0	65	103	0	0	2	0	26	0	0	0
157	0	0	0	0	0	1	0	0	2	0	0	4	0	0	0	5	0	1	1	0	0	1	14	1	0	86	0	0	1	21	0	0	0	0	0	0	1	0	0	46	91	0	0	1	0	11	0	1	0
158	0	0	0	0	0	0	0	1	3	0	6	1	0	0	7	5	0	2	0	0	0	1	18	0	0	102	0	0	0	22	0	0	0	0	0	6	2	4	0	41	103	0	0	0	0	12	0	0	1
159	0	0	0	0	0	0	0	0	0	0	3	1	0	0	0	2	0	1	0	0	0	0	11	0	0	62	0	0	0	12	0	0	0	0	1	4	7	0	0	29	109	0	0	2	2	14	0	0	1
167	0	0	0	0	0	0	0	0	2	0	3	0	0	1	0	2	0	6	0	0	0	1	14	0	0	103	1	0	0	12	0	0	0	0	0	7	10	1	0	43	110	0	0	1	6	20	0	0	1
168	0	1	0	0	0	0	0	0	1	0	2	0	0	2	0	0	0	0	0	0	0	2	19	0	0	57	0	0	0	15	1	0	5	0	0	1	2	2	0	35	66	2	0	0	2	37	0	0	0
169	0	0	0	0	0	0	0	0	0	0	5	0	0	1	1	2	0	0	0	0	0	1	14	1	0	108	0	0	0	9	0	0	0	0	0	11	3	5	0	38	101	0	0	2	0	13	0	0	0
177	0	0	0	0	0	0	0	0	0	0	2	0	0	0	0	0	0	2	0	0	0	0	7	0	0	63	0	0	0	21	0	0	0	0	0	2	3	2	0	17	63	1	0	1	1	7	0	0	0
192	0	0	1	0	0	0	0	0	0	0	1	3	0	0	0	2	0	4	0	0	0	0	14	0	0	63	0	0	0	5	0	0	0	0	0	4	2	0	0	19	75	0	0	0	0	4	0	0	0
207	0	0	1	0	0	0	0	0	0	0	1	0	1	0	0	0	0	2	0	0	0	1	4	1	0	28	0	0	0	7	0	0	0	0	0	1	0	0	0	34	38	0	2	1	1	5	0	0	0
227	2	0	0	0	0	0	0	0	0	0	0	0	0	0	0	0	0	1	0	0	0	2	5	0	0	37	0	0	0	44	0	0	0	0	0	1	5	0	0	16	46	0	0	2	0	20	0	0	1
237	0	0	1	0	0	0	0	0	0	0	1	0	0	0	1	1	3	0	0	0	0	0	6	0	0	73	0	0	0	15	0	0	0	0	0	12	5	3	0	39	71	0	0	1	0	11	0	0	0
251	0	0	5	0	2	0	0	0	0	0	6	0	0	1	0	0	0	0	0	0	0	0	10	0	0	50	0	0	0	66	1	0	0	0	0	4	4	0	1	44	86	0	0	1	0	71	0	0	0
266	0	0	0	0	0	0	0	0	1	0	1	3	0	0	0	0	2	2	0	0	0	0	9	0	0	82	0	0	0	17	0	0	0	0	0	2	0	3	1	75	82	0	0	1	2	2	0	0	0
281	0	0	0	0	0	0	0	0	0	0	3	0	0	0	0	1	3	0	0	0	0	0	3	0	0	73	0	0	0	5	0	0	0	0	0	0	0	1	0	25	58	0	0	2	0	5	1	0	0
296	0	0	2	0	0	0	1	0	0	0	1	0	0	1	1	1	1	0	0	0	0	2	5	0	0	92	0	0	0	17	0	0	0	0	0	4	2	2	0	25	146	2	0	0	1	7	1	0	0
311	0	0	1	0	0	0	0	0	0	0	3	2	0	0	0	1	0	0	0	0	0	0	3	0	1	63	0	0	0	6	0	0	0	0	0	3	0	0	0	45	100	0	0	1	1	7	0	0	0
321	0	0	0	0	0	0	0	0	0	0	3	0	0	0	0	0	1	0	0	0	0	0	12	0	0	73	1	0	0	77	1	0	0	0	0	6	5	1	0	90	153	2	2	1	1	46	0	0	0
335	0	0	2	0	0	0	0	0	0	0	3	0	0	0	0	0	1	0	0	0	0	0	2	1	0	89	0	0	0	7	0	0	0	0	0	2	2	3	0	29	112	0	0	0	0	4	0	0	0
322	0	0	0	0	0	0	0	1	0	0	5	0	0	1	0	0	0	1	0	0	1	1	4	0	0	77	1	0	0	6	0	1	0	0	0	3	0	0	0	62	185	0	0	0	0	6	0	0	0
332	0	0	1	0	0	0	0	1	0	0	3	0	0	0	1	0	1	1	0	0	0	0	3	0	0	68	1	0	0	8	0	0	0	0	0	2	2	0	0	49	146	0	0	1	0	4	0	0	0
341	0	0	4	0	0	0	0	0	0	0	3	0	0	0	0	0	0	0	0	1	0	1	16	0	0	86	1	0	0	47	1	0	1	0	0	3	3	0	2	115	350	1	0	0	0	63	0	0	0
[truncated: 61 more columns]

[truncated: 3 more sheets: Precipitation, tephra, pollen_zones]
